# Supplementary material for: Total organic halogen (TOX) in treated wastewaters: an optimized method and comparison with target analysis
Source: Royal Society of Chemistry journal article supplement (doi:10.1039/d3ew00198a), 2023-01-01
Supplement: d3ew00198a1.pdf [file d3ew00198a1.pdf]

**Supporting Information**

**for**

**Total organic halogen (TOX) in treated wastewaters: an optimized method and comparison  
with target analysis**

Chad Verwold<sup>1</sup>, Chris Tremblay<sup>1</sup>, Miriam Patron<sup>1</sup>, Susana Y. Kimura<sup>1,\*</sup>

<sup>1</sup>University of Calgary, Department of Chemistry, 2500 University Dr. NW, Calgary, AB, T2N  
1N4, Canada

**Table S1:** SGS AXYS Method MLA-075 REV 09 VER 01. Target compounds for PCPPs analysis by LC-MS/MS and reporting limits (RL). This method is suitable for the determination of a suite of hormones and pharmaceutical and personal care compounds in biosolid, aqueous and POCIS samples. The analysis required extraction at two pH conditions. Basic extraction (\*) at a pH of 10 and acidic extraction at a pH of 2. All aqueous samples were filtered and the aqueous portion was cleaned up by solid phase extraction before analysis by LC/ESI-MS/MS. Surrogate standards are added to all samples before extraction.

| <b>Name</b>                   | <b>RL<br/>(ng/L)</b> | <b>Name</b>          | <b>RL<br/>(ng/L)</b> |
|-------------------------------|----------------------|----------------------|----------------------|
| 1,7-Dimethylxanthine          | 54.9                 | Hydrocodone*         | 1.12                 |
| 4-Epianhydrochlortetracycline | 75.6                 | Hydrocortisone       | 5.49                 |
| 4-Epianhydrotetracycline      | 13.7                 | Ibuprofen            | 3.66                 |
| 4-Epichlortetracycline        | 13.7                 | Isochlortetracycline | 5.49                 |
| 4-Epioxytetracycline          | 5.49                 | Lincomycin           | 2.74                 |
| 4-Epitetracycline             | 5.49                 | Lomefloxacin         | 2.74                 |
| 10-hydroxy-amitriptyline      | 0.194                | Meprobamate          | 1.37                 |
| 2-hydroxy-ibuprofen           | 5.85                 | Metformin*           | 0.281                |
| Acetaminophen                 | 13.7                 | Methylprednisolone   | 3.66                 |
| Albuterol*                    | 0.281                | Metoprolol           | 0.459                |
| Alprazolam                    | 0.274                | Miconazole           | 1.37                 |
| Amitriptyline                 | 0.274                | Minocycline          | 54.9                 |
| Amlodipine                    | 0.92                 | Naproxen             | 1.83                 |
| Amphetamine*                  | 0.281                | Norfloxacin          | 38.2                 |
| Anhydrochlortetracycline      | 48.7                 | Norfluoxetine        | 0.459                |
| Anhydrotetracycline           | 13.7                 | Norgestimate         | 5.23                 |
| Atenolol*                     | 0.281                | Norverapamil         | 0.137                |
| Atorvastatin*                 | 1.12                 | Ofloxacin            | 1.37                 |
| Azithromycin                  | 3.13                 | Ormetoprim           | 0.549                |
| Benzoylcegonine               | 0.137                | Oxacillin 1          | 2.74                 |
| Benzotropine                  | 0.64                 | Oxolinic acid        | 4.48                 |
| Betamethasone                 | 1.37                 | Oxycodone*           | 0.562                |
| Bisphenol A                   | 5.49                 | Oxytetracycline      | 5.49                 |
| Caffeine                      | 13.7                 | Paroxetine           | 0.92                 |
| Carbadox                      | 2.74                 | Penicillin G 1       | 2.77                 |
| Carbamazepine                 | 1.37                 | Penicillin V         | 2.74                 |
| Cefotaxime                    | 26.7                 | Prednisolone         | 3.66                 |
| Chlortetracycline             | 5.49                 | Prednisone           | 5.49                 |
| Cimetidine*                   | 0.562                | Promethazine         | 0.274                |
| Ciprofloxacin                 | 7.3                  | Propoxyphene         | 0.274                |

|                                |       |                       |       |
|--------------------------------|-------|-----------------------|-------|
| Clarithromycin                 | 1.37  | Propranolol           | 0.274 |
| Clinafloxacin                  | 9.97  | Ranitidine*           | 0.562 |
| Clonidine*                     | 1.12  | Roxithromycin         | 0.468 |
| Cloxacillin 1                  | 3.01  | Sarafloxacin          | 13.7  |
| Cocaine                        | 0.137 | Sertraline            | 0.274 |
| Codeine*                       | 1.12  | Simvastatin           | 1.84  |
| Cotinine*                      | 0.281 | Sulfachloropyridazine | 1.37  |
| DEET (N,N-diethyl-m-toluamide) |       |                       |       |
| 0.274                          |       | Sulfadiazine          | 1.37  |
| Dehydronifedipine              | 0.699 | Sulfadimethoxine      | 0.376 |
| Demeclocycline                 | 13.7  | Sulfamerazine         | 0.557 |
| Desmethyldiltiazem             | 0.137 | Sulfamethazine        | 2.47  |
| Diazepam                       | 0.459 | Sulfamethizole        | 0.549 |
| Digoxigenin                    | 17.7  | Sulfamethoxazole      | 2.39  |
| Digoxin                        | 5.49  | Sulfanilamide         | 13.7  |
| Diltiazem                      | 0.534 | Sulfathiazole         | 1.37  |
| Diphenhydramine                | 0.549 | Tetracycline          | 5.49  |
| Doxycycline                    | 5.49  | Theophylline          | 5.49  |
| Enalapril*                     | 0.281 | Thiabendazole         | 1.37  |
| Enrofloxacin                   | 2.74  | Trenbolone            | 1.84  |
| Erythromycin                   | 2.1   | Trenbolone acetate    | 0.274 |
| Flumequine                     | 1.37  | Triamterene*          | 0.281 |
| Fluocinonide                   | 1.84  | Triclocarban          | 0.366 |
| Fluoxetine                     | 1.37  | Triclosan             | 5.49  |
| Fluticasone propionate         | 1.84  | Trimethoprim          | 1.37  |
| Furosemide                     | 3.66  | Tylosin               | 5.49  |
| Gemfibrozil                    | 0.732 | Valsartan             | 3.66  |
| Glipizide                      | 0.732 | Verapamil             | 0.137 |
| Glyburide                      | 0.732 | Virginiamycin M1      | 6.81  |
| Hydrochlorothiazide            | 8.05  | Warfarin              | 0.366 |

**Table S2:** SGS AXYS Method MLA-096 REV.01 VER. 07. Target compounds for HFRs analysis by GC-(ECNI)-MS and reporting limits (RL). This method describes the analysis of selected chlorinated and brominated flame retardants in aqueous samples. The samples are spiked with a suite of isotopically labeled quantification standards and liquid-liquid extracted with dichloromethane. The extracts are cleaned up by liquid-liquid extraction with 1:1 acetonitrile:water at three pHs (pH=10, pH=7 and 2). Influent samples are further cleaned up using gel permeation chromatography if necessary. The resulting extracts are dried over anhydrous sodium sulfate, reduced and analyzed by gas chromatography electron capture negative ion mass spectrometry (GC-(ECNI)-MS).

| <b>Name</b> | <b>RL (ng/L)</b> | <b>Name</b> | <b>RL (ng/L)</b> |
|-------------|------------------|-------------|------------------|
| Dechlorane  | 0.0732           | Total TBECH | 0.699            |
| DP Anti     | 0.152            | HBB         | 0.0123           |
| DP Syn      | 0.107            | PBBZ        | 0.0526           |
| Dec 602     | 0.0197           | 1,2,4,5-TBB | 0.0701           |
| Dec 603     | 0.0161           | 1,2,4-TriBB | 0.588            |
| Dec 604     | 0.29             | 1,2-DiBB    | 0.123            |
| HCDBCO      | 0.0798           | 1,4-DiBB    | 0.232            |
| ATE         | 0.0831           | PBT         | 0.0405           |
| BATE        | 0.264            | PBEB        | 0.0299           |
| DPTE        | 0.687            | PBBB        | 0.383            |
| BTBPE       | 0.682            | pTBX        | 1.62             |
| BEHTBP      | 0.377            | TBCT        | 0.0426           |
| EHTBB       | 0.381            |             |                  |

**Table S3:** SGS AXYS Method MLA-098 REV.01 VER.03. Target compounds for OPFRs analysis by LC-MS/MS and reporting limits (RL). This method describes the analysis of organophosphate flame retardants (OPFRs) in whole aqueous samples containing up to 1% solids. Samples are spiked with isotopically labelled surrogate standards and liquid-liquid extracted with dichloromethane. The resulting extract is cleaned up by solid phase extraction on an aminopropyl cartridge and by column chromatography using a silica chromatographic column. The final extract is spiked with recovery standard and analyzed by liquid chromatography and tandem mass spectrometry (LC-MS/MS). Typical reporting limits are in the range of 0.1 - 5 ng/L for a 0.5 L aqueous samples. For influent and effluent samples reporting limits are in the range of 5 - 250 ng/L for 0.1 L sample sizes. For TBP and TBEP quantification limits are elevated by laboratory background levels.

| <b>Name</b> | <b>RL (ng/L)</b> | <b>Name</b> | <b>RL (ng/L)</b> |
|-------------|------------------|-------------|------------------|
| TEP         | 0.202            | TDBPP       | 6.07             |
| TCEP        | 2.02             | TBP         | 0.202            |
| TPrP        | 0.202            | TBEP        | 40.6             |
| TCPP        | 1.01             | TCrP*       | 0.404            |
| V6          | 1.01             | EHDPP       | 10.1             |
| TDCPP       | 10.1             | TEHP        | 0.404            |
| TPP         | 1.01             |             |                  |

**Table S4:** SGS AXYS Method MLA-110 REV.02 VER. 11. Target compounds for PFAS analysis by LC-MS/MS and reporting limits (RL). This method describes the analysis of per- and polyfluoroalkyl substances (PFAS) in aqueous, solid, biosolid, tissue, blood/serum and AFFF product samples and solvent extracts, determined as the total of linear and branched isomers. After spiking with isotopically labeled surrogate standards samples are extracted and cleaned up by solid phase extraction using weak anion exchange cartridges. The extracts are then analyzed by liquid chromatography/mass spectrometry (LC-MS/MS). Extract samples don't undergo solid phase extraction. The samples are spiked with surrogate and recovery standards and analyzed by LC-MS/MS. Final sample concentrations are determined by isotope dilution/internal standard quantification.

| <b>Name</b> | <b>RL (ng/L)</b> | <b>Name</b>  | <b>RL (ng/L)</b> |
|-------------|------------------|--------------|------------------|
| PFBA        | 1.47             | 6:2 FTS      | 1.33             |
| PFPeA       | 0.737            | 8:2 FTS      | 1.47             |
| PFHxA       | 0.368            | 3:3 FTCA     | 1.47             |
| PFHpA       | 0.368            | 5:3 FTCA     | 9.21             |
| PFOA        | 0.368            | 7:3 FTCA     | 9.21             |
| PFNA        | 0.368            | PFOSA        | 0.368            |
| PFDA        | 0.368            | N-MeFOSA     | 0.424            |
| PFUnA       | 0.368            | N-EtFOSA     | 0.921            |
| PFDoA       | 0.368            | N-MeFOSAA    | 0.368            |
| PFTTrDA     | 0.368            | N-EtFOSAA    | 0.368            |
| PFTeDA      | 0.368            | N-MeFOSE     | 3.68             |
| PFBS        | 0.368            | N-EtFOSE     | 2.76             |
| PFPeS       | 0.37             | HFPO-DA      | 1.4              |
| PFHxS       | 0.368            | ADONA        | 1.47             |
| PFHpS       | 0.368            | NFDHA        | 0.737            |
| PFOS        | 0.368            | PFMPA        | 0.737            |
| PFNS        | 0.368            | PFMBA        | 0.368            |
| PFDS        | 0.368            | 9Cl-PF3ONS   | 1.48             |
| PFDoS       | 0.368            | 11Cl-PF3OUdS | 1.48             |
| 4:2 FTS     | 1.47             | PFEESA       | 0.368            |

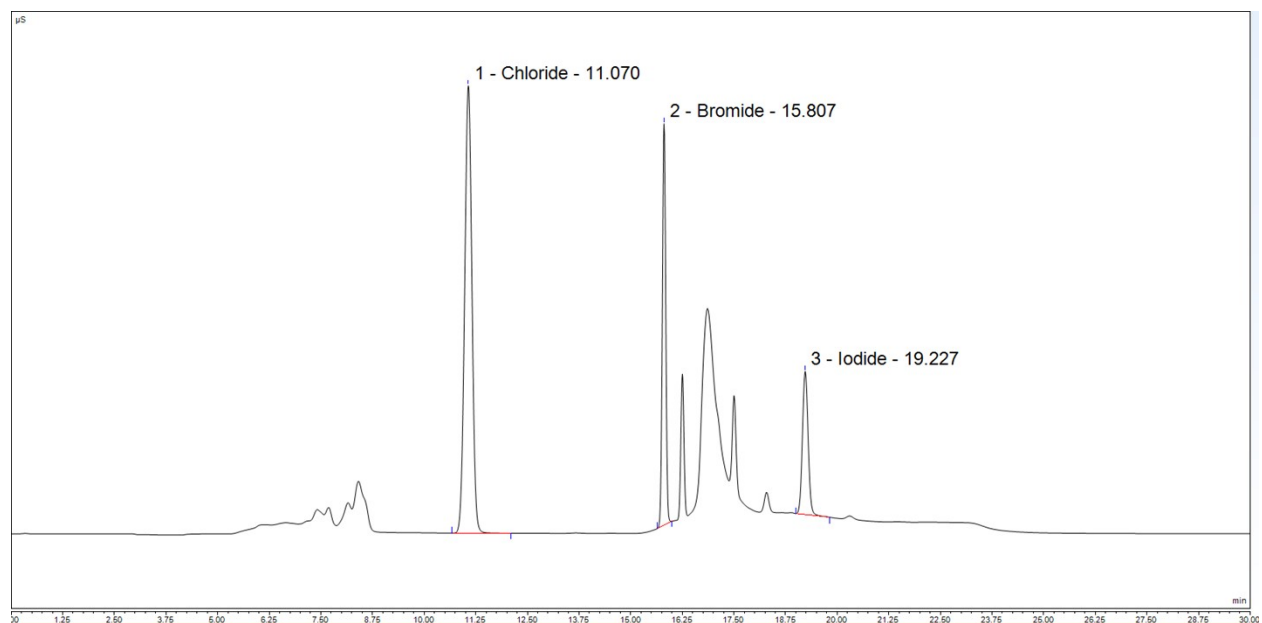

**Figure S1:** Ion chromatogram of 100  $\mu\text{g/L}$  analytical standard of chloride, bromide, and iodide in absorption solution (20  $\mu\text{M}$  ammonium hydroxide + 0.003% hydrogen peroxide in ultrapure water). A Dionex AS20 analytical column was used with a flow rate of 0.25 mL/min.

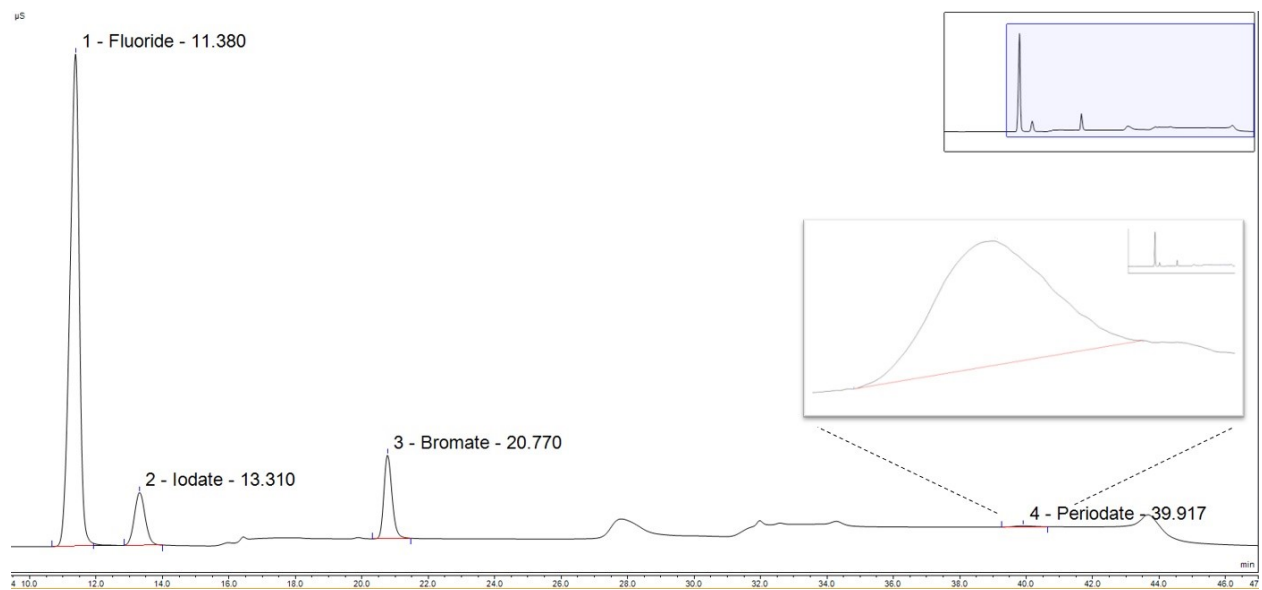

**Figure S2:** Ion chromatogram of 500  $\mu\text{g/L}$  analytical standard of fluoride, iodate, bromate, and periodate in ultrapure water. A Dionex AS15 analytical column was used with a flow rate of 0.3 mL/min.



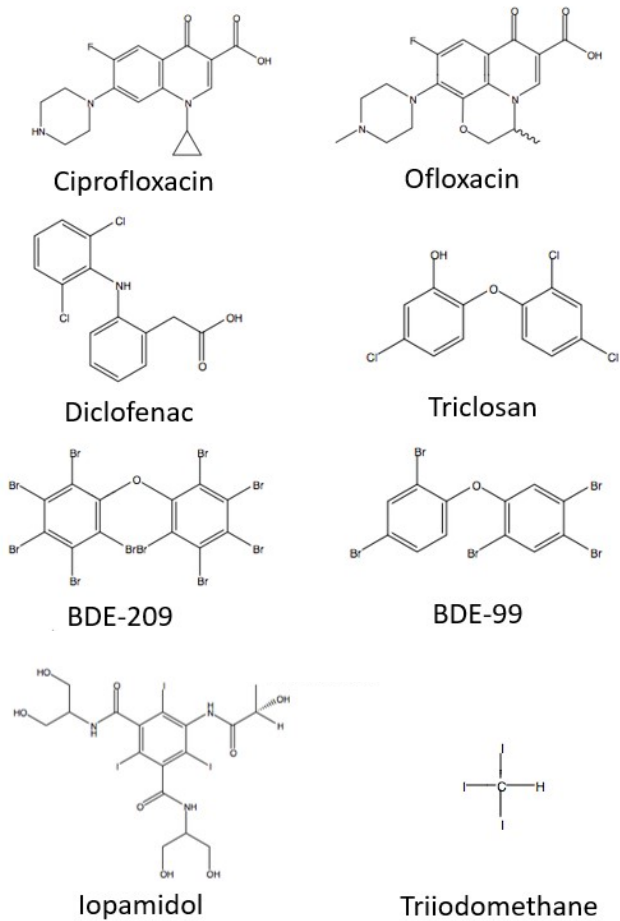

**Figure S3.** Structures and names of emerging contaminants that were used for percent recovery experiments.
